# Supplementary material for: Non-Linear Concentration-Response Relationships between Ambient Ozone and Daily Mortality
Source: PubMed Central journal article supplement (PMC4468145; doi:10.1371/journal.pone.0129423), 2015-06-15
Supplement: pone.0129423.s001.pdf [file pone.0129423.s001.pdf]

## Supplemental Material

**Title:** Non-Linear Concentration-Response Relationships between Ambient Ozone and Daily Mortality

**Authors:** Sanghyuk Bae<sup>1)</sup>, Youn-Hee Lim<sup>2)</sup>, Saori Kashima<sup>3)</sup>, Takashi Yorifuji<sup>4)</sup>, Yasushi Honda<sup>5)</sup>, Ho Kim<sup>6)</sup>, Yun-Chul Hong<sup>1)7)</sup>

**Affiliations:** <sup>1)</sup> Department of Preventive Medicine, College of Medicine, Seoul National University, Seoul, Korea

<sup>2)</sup> Institutes of Health and Environment, Seoul National University, Seoul, Korea

<sup>3)</sup> Department of Public Health and Health Policy, Institute of Biomedical & Health Science, Hiroshima University, Hiroshima, Japan

<sup>4)</sup> Department of Human Ecology, Okayama University Graduate School of Environmental and Life Science, Okayama, Japan

<sup>5)</sup> Department of Health Care Policy and Health Economics, Faculty of Medicine, University of Tsukuba, Tsukuba, Japan

<sup>6)</sup> Department of Epidemiology and Biostatistics, Graduate School of Public Health, Seoul National University, Seoul, Korea

<sup>7)</sup> Institute of Environmental Medicine, Seoul National University Medical Research Center, Seoul, Korea

Table S1. Associations between daily mean O<sub>3</sub> and daily mortality in 13 Japanese and Korean cities from 2000 to 2009

| City    | Lag       | Linear Model |          |         |         | Spline Model |         | ΔAIC  |
|---------|-----------|--------------|----------|---------|---------|--------------|---------|-------|
|         |           | Beta         | SE       | P       | AIC     | P            | AIC     |       |
| Seoul   | 0         | -0.000228    | 0.000191 | 0.2333  | 28000.5 | 0.0222       | 27992.5 | -8.0  |
|         | 1         | -0.000372    | 0.000170 | 0.0288  | 27976.7 | 0.0002       | 27959.9 | -16.7 |
|         | 2         | -0.000270    | 0.000163 | 0.0979  | 27955.3 | 0.0615       | 27951.8 | -3.5  |
|         | 3         | -0.000381    | 0.000163 | 0.0190  | 27937.2 | 0.0176       | 27932.8 | -4.4  |
|         | 4         | -0.000500    | 0.000163 | 0.0022  | 27908.4 | 0.0060       | 27906.0 | -2.4  |
|         | 5         | -0.000440    | 0.000164 | 0.0073  | 27887.7 | 0.0073       | 27887.7 | 0.0   |
|         | 0-1       | -0.000441    | 0.000217 | 0.0422  | 27977.2 | <0.0001      | 27929.4 | -47.8 |
|         | 0-2       | -0.000500    | 0.000228 | 0.0282  | 27953.2 | <0.0001      | 27916.7 | -36.5 |
|         | 0-3       | -0.000603    | 0.000237 | 0.0109  | 27936.1 | 0.0002       | 27921.0 | -15.1 |
|         | 0-4       | -0.000728    | 0.000246 | 0.0031  | 27908.8 | 0.0002       | 27897.4 | -11.4 |
| 0-5     | -0.000820 | 0.000254     | 0.0012   | 27884.5 | 0.0009  | 27877.8      | -6.7    |       |
| Incheon | 0         | -0.000695    | 0.000315 | 0.0276  | 22748.7 | 0.0276       | 22748.7 | 0.0   |
|         | 1         | -0.000368    | 0.000303 | 0.2246  | 22747.5 | 0.2852       | 22747.0 | -0.5  |
|         | 2         | -0.000002    | 0.000297 | 0.9940  | 22742.5 | 0.9943       | 22742.5 | 0.0   |
|         | 3         | -0.000006    | 0.000297 | 0.8371  | 22736.5 | 0.8371       | 22736.5 | 0.0   |
|         | 4         | -0.000292    | 0.000299 | 0.3285  | 22731.2 | 0.3385       | 22731.2 | -0.1  |
|         | 5         | -0.000877    | 0.000300 | 0.0034  | 22718.8 | 0.0226       | 22717.9 | -0.9  |
|         | 0-1       | -0.000721    | 0.000363 | 0.0473  | 22734.2 | 0.1221       | 22733.8 | -0.4  |
|         | 0-2       | -0.000548    | 0.000390 | 0.1593  | 22718.8 | 0.1497       | 22716.2 | -2.6  |
|         | 0-3       | -0.000484    | 0.000410 | 0.2372  | 22701.8 | 0.1030       | 22698.4 | -3.4  |
|         | 0-4       | -0.000537    | 0.000427 | 0.2085  | 22683.6 | 0.1795       | 22681.8 | -1.8  |
| 0-5     | -0.000801 | 0.000443     | 0.0706   | 22664.5 | 0.1578  | 22663.6      | -0.9    |       |

|         |     |           |          |        |         |        |         |      |
|---------|-----|-----------|----------|--------|---------|--------|---------|------|
| Daejon  | 0   | -0.000790 | 0.000486 | 0.1040 | 20118.9 | 0.1286 | 20118.6 | -0.4 |
|         | 1   | -0.000935 | 0.000427 | 0.0287 | 20111.6 | 0.0892 | 20111.5 | -0.1 |
|         | 2   | -0.000790 | 0.000409 | 0.0536 | 20108.1 | 0.0541 | 20108.1 | 0.0  |
|         | 3   | -0.000354 | 0.000406 | 0.3830 | 20088.2 | 0.3855 | 20088.2 | 0.0  |
|         | 4   | -0.000453 | 0.000405 | 0.2640 | 20090.9 | 0.4022 | 20091.0 | 0.1  |
|         | 5   | -0.000785 | 0.000405 | 0.0525 | 20080.0 | 0.0510 | 20077.4 | -2.6 |
|         | 0-1 | -0.001175 | 0.000528 | 0.0261 | 20079.5 | 0.0262 | 20079.5 | 0.0  |
|         | 0-2 | -0.001301 | 0.000545 | 0.0170 | 20043.1 | 0.1559 | 20043.8 | 0.8  |
|         | 0-3 | -0.001186 | 0.000559 | 0.0338 | 19990.1 | 0.2030 | 19990.4 | 0.3  |
|         | 0-4 | -0.001210 | 0.000572 | 0.0344 | 19960.8 | 0.1117 | 19959.0 | -1.8 |
|         | 0-5 | -0.001330 | 0.000583 | 0.0225 | 19925.1 | 0.0472 | 19921.6 | -3.5 |
|         |     |           |          |        |         |        | 0.0     |      |
| Daegu   | 0   | 0.000319  | 0.000352 | 0.3648 | 22925.6 | 0.0535 | 22919.2 | -6.4 |
|         | 1   | 0.000035  | 0.000293 | 0.9057 | 22918.7 | 0.5760 | 22918.1 | -0.7 |
|         | 2   | 0.000181  | 0.000278 | 0.5154 | 22912.6 | 0.5155 | 22912.6 | 0.0  |
|         | 3   | -0.000479 | 0.000276 | 0.0821 | 22906.7 | 0.1286 | 22904.7 | -2.0 |
|         | 4   | 0.000138  | 0.000274 | 0.6157 | 22904.5 | 0.6195 | 22904.5 | 0.0  |
|         | 5   | -0.000352 | 0.000275 | 0.2007 | 22906.3 | 0.2019 | 22906.3 | 0.0  |
|         | 0-1 | 0.000209  | 0.000376 | 0.5794 | 22906.1 | 0.1240 | 22901.7 | -4.5 |
|         | 0-2 | 0.000266  | 0.000384 | 0.4887 | 22888.9 | 0.2350 | 22886.1 | -2.8 |
|         | 0-3 | -0.000040 | 0.000394 | 0.9197 | 22872.9 | 0.3797 | 22870.7 | -2.2 |
|         | 0-4 | 0.000006  | 0.000403 | 0.9889 | 22855.6 | 0.1951 | 22852.6 | -3.0 |
|         | 0-5 | -0.000153 | 0.000411 | 0.7104 | 22835.7 | 0.4653 | 22834.8 | -0.9 |
| Gwangju | 0   | 0.000614  | 0.000498 | 0.2170 | 20287.9 | 0.2770 | 20286.4 | -1.5 |
|         | 1   | -0.000059 | 0.000460 | 0.8990 | 20286.3 | 0.8990 | 20286.3 | 0.0  |
|         | 2   | 0.000326  | 0.000445 | 0.4640 | 20283.6 | 0.4650 | 20283.6 | 0.0  |

|       |     |           |          |        |         |        |         |       |
|-------|-----|-----------|----------|--------|---------|--------|---------|-------|
|       | 3   | 0.000426  | 0.000442 | 0.3350 | 20273.7 | 0.3280 | 20272.9 | -0.8  |
|       | 4   | 0.000128  | 0.000443 | 0.7730 | 20263.7 | 0.7730 | 20263.7 | 0.0   |
|       | 5   | -0.000210 | 0.000443 | 0.6360 | 20260.0 | 0.6370 | 20260.0 | 0.0   |
|       | 0-1 | 0.000333  | 0.000551 | 0.5460 | 20267.8 | 0.5310 | 20267.9 | 0.1   |
|       | 0-2 | 0.000450  | 0.000577 | 0.4360 | 20251.3 | 0.1250 | 20246.7 | -4.6  |
|       | 0-3 | 0.000567  | 0.000596 | 0.3420 | 20231.8 | 0.0881 | 20226.4 | -5.4  |
|       | 0-4 | 0.000534  | 0.000613 | 0.3840 | 20211.9 | 0.0363 | 20203.7 | -8.2  |
|       | 0-5 | 0.000446  | 0.000628 | 0.4780 | 20191.3 | 0.0559 | 20184.0 | -7.4  |
| Busan | 0   | 0.000104  | 0.000266 | 0.6960 | 24853.0 | 0.0230 | 24841.1 | -11.9 |
|       | 1   | 0.000054  | 0.000243 | 0.8240 | 24836.1 | 0.4746 | 24835.2 | -1.0  |
|       | 2   | 0.000413  | 0.000240 | 0.3326 | 24827.3 | 0.0851 | 24827.3 | 0.0   |
|       | 3   | 0.000308  | 0.000239 | 0.1980 | 24817.2 | 0.1980 | 24817.2 | 0.0   |
|       | 4   | -0.000011 | 0.000240 | 0.9649 | 24802.1 | 0.7566 | 24801.9 | -0.2  |
|       | 5   | 0.000001  | 0.000240 | 0.9974 | 24787.3 | 0.9971 | 24787.3 | 0.0   |
|       | 0-1 | 0.000107  | 0.000294 | 0.7161 | 24829.5 | 0.0026 | 24814.6 | -14.9 |
|       | 0-2 | 0.000322  | 0.000310 | 0.2997 | 24813.4 | 0.0208 | 24804.8 | -8.6  |
|       | 0-3 | 0.000428  | 0.000325 | 0.1882 | 24797.5 | 0.0731 | 24792.9 | -4.6  |
|       | 0-4 | 0.000383  | 0.000339 | 0.2585 | 24775.6 | 0.0374 | 24769.2 | -6.5  |
|       | 0-5 | 0.000375  | 0.000350 | 0.2849 | 24755.1 | 0.1311 | 24751.4 | -3.7  |
| Ulsan | 0   | 0.000189  | 0.000629 | 0.7640 | 18745.5 | 0.1272 | 18740.3 | -5.2  |
|       | 1   | -0.000359 | 0.000561 | 0.5220 | 18745.7 | 0.5221 | 18745.7 | 0.0   |
|       | 2   | -0.000313 | 0.000542 | 0.5630 | 18731.6 | 0.5647 | 18731.6 | 0.0   |
|       | 3   | -0.000065 | 0.000541 | 0.9040 | 18727.1 | 0.7267 | 18726.8 | -0.3  |
|       | 4   | 0.000106  | 0.000542 | 0.8450 | 18720.6 | 0.4949 | 18719.8 | -0.8  |
|       | 5   | -0.000629 | 0.000545 | 0.2480 | 18708.5 | 0.2486 | 18708.5 | 0.0   |
|       | 0-1 | -0.000143 | 0.000690 | 0.8360 | 18711.0 | 0.8361 | 18711.0 | 0.0   |

|         |     |           |          |         |         |         |         |       |
|---------|-----|-----------|----------|---------|---------|---------|---------|-------|
|         | 0-2 | -0.000285 | 0.000721 | 0.6930  | 18668.4 | 0.6933  | 18668.4 | 0.0   |
|         | 0-3 | -0.000267 | 0.000751 | 0.7220  | 18634.1 | 0.5995  | 18634.5 | 0.4   |
|         | 0-4 | -0.000216 | 0.000778 | 0.7810  | 18602.1 | 0.3772  | 18600.3 | -1.8  |
|         | 0-5 | -0.000384 | 0.000804 | 0.6330  | 18560.7 | 0.5731  | 18561.2 | 0.5   |
| Sapporo | 0   | -0.000041 | 0.000312 | 0.8961  | 23369.3 | 0.8270  | 23369.3 | -0.1  |
|         | 1   | -0.000448 | 0.000305 | 0.1417  | 23361.8 | 0.1420  | 23361.8 | 0.0   |
|         | 2   | -0.000346 | 0.000301 | 0.2499  | 23357.4 | 0.2500  | 23357.4 | 0.0   |
|         | 3   | -0.000235 | 0.000301 | 0.4343  | 23347.9 | 0.4350  | 23347.9 | 0.0   |
|         | 4   | -0.000227 | 0.000302 | 0.4527  | 23344.5 | 0.4530  | 23344.5 | 0.0   |
|         | 5   | -0.000212 | 0.000303 | 0.4847  | 23336.2 | 0.0777  | 23330.2 | -6.1  |
|         | 0-1 | -0.000290 | 0.000333 | 0.3851  | 23358.0 | 0.3850  | 23358.0 | 0.0   |
|         | 0-2 | -0.000359 | 0.000344 | 0.2959  | 23346.8 | 0.2960  | 23346.8 | 0.0   |
|         | 0-3 | -0.000351 | 0.000351 | 0.3175  | 23331.6 | 0.3180  | 23331.6 | 0.0   |
|         | 0-4 | -0.000360 | 0.000357 | 0.3132  | 23319.0 | 0.3130  | 23319.0 | 0.0   |
|         | 0-5 | -0.000348 | 0.000362 | 0.3364  | 23305.2 | 0.3370  | 23305.2 | 0.0   |
| Tokyo   | 0   | -0.000585 | 0.000130 | <0.0001 | 30606.4 | <0.0001 | 30584.8 | -21.6 |
|         | 1   | -0.000808 | 0.000117 | <0.0001 | 30570.0 | <0.0001 | 30546.0 | -24.0 |
|         | 2   | -0.000324 | 0.000115 | 0.0049  | 30602.8 | 0.0180  | 30601.2 | -1.6  |
|         | 3   | -0.000374 | 0.000116 | 0.0012  | 30591.2 | 0.0012  | 30591.2 | 0.0   |
|         | 4   | -0.000626 | 0.000116 | <0.0001 | 30565.5 | <0.0001 | 30565.5 | 0.0   |
|         | 5   | -0.000564 | 0.000117 | <0.0001 | 30563.7 | <0.0001 | 30557.5 | -6.2  |
|         | 0-1 | -0.000893 | 0.000138 | <0.0001 | 30575.8 | <0.0001 | 30543.4 | -32.4 |
|         | 0-2 | -0.000810 | 0.000143 | <0.0001 | 30578.5 | <0.0001 | 30556.2 | -22.4 |
|         | 0-3 | -0.000803 | 0.000148 | <0.0001 | 30572.1 | <0.0001 | 30557.0 | -15.1 |
|         | 0-4 | -0.000897 | 0.000153 | <0.0001 | 30559.8 | <0.0001 | 30550.2 | -9.5  |
|         | 0-5 | -0.000956 | 0.000157 | <0.0001 | 30549.5 | <0.0001 | 30543.6 | -5.9  |

|            |     |           |          |        |         |        |         |      |
|------------|-----|-----------|----------|--------|---------|--------|---------|------|
| Nagoya     | 0   | -0.000140 | 0.000290 | 0.6279 | 24752.4 | 0.3470 | 24750.2 | -2.1 |
|            | 1   | -0.000571 | 0.000254 | 0.0246 | 24742.0 | 0.0051 | 24734.8 | -7.2 |
|            | 2   | 0.000038  | 0.000240 | 0.8755 | 24741.1 | 0.8758 | 24741.1 | 0.0  |
|            | 3   | 0.000356  | 0.000242 | 0.1403 | 24729.1 | 0.1405 | 24729.1 | 0.0  |
|            | 4   | 0.000038  | 0.000241 | 0.8748 | 24725.7 | 0.1434 | 24720.9 | -4.7 |
|            | 5   | -0.000376 | 0.000242 | 0.1210 | 24717.4 | 0.0653 | 24712.5 | -4.9 |
|            | 0-1 | -0.000499 | 0.000308 | 0.1053 | 24744.4 | 0.0248 | 24737.8 | -6.6 |
|            | 0-2 | -0.000321 | 0.000313 | 0.3050 | 24740.2 | 0.0458 | 24734.1 | -6.1 |
|            | 0-3 | -0.000090 | 0.000320 | 0.7788 | 24731.3 | 0.1413 | 24727.2 | -4.0 |
|            | 0-4 | -0.000061 | 0.000327 | 0.8517 | 24725.6 | 0.1424 | 24721.3 | -4.4 |
|            | 0-5 | -0.000174 | 0.000334 | 0.6019 | 24719.6 | 0.2248 | 24716.5 | -3.1 |
| Osaka      | 0   | -0.000239 | 0.000223 | 0.2838 | 26441.9 | 0.2840 | 26441.9 | 0.0  |
|            | 1   | -0.000745 | 0.000195 | 0.0001 | 26421.1 | 0.0001 | 26413.7 | -7.4 |
|            | 2   | 0.000143  | 0.000183 | 0.4336 | 26429.2 | 0.4342 | 26429.2 | 0.0  |
|            | 3   | 0.000019  | 0.000183 | 0.9158 | 26424.5 | 0.5989 | 26423.7 | -0.8 |
|            | 4   | -0.000160 | 0.000183 | 0.3810 | 26413.3 | 0.3811 | 26413.3 | 0.0  |
|            | 5   | 0.000161  | 0.000184 | 0.3801 | 26406.5 | 0.3802 | 26406.5 | 0.0  |
|            | 0-1 | -0.000741 | 0.000247 | 0.0027 | 26426.6 | 0.0052 | 26424.5 | -2.2 |
|            | 0-2 | -0.000436 | 0.000255 | 0.0871 | 26426.8 | 0.1453 | 26425.7 | -1.1 |
|            | 0-3 | -0.000337 | 0.000264 | 0.2016 | 26422.9 | 0.2019 | 26422.9 | 0.0  |
|            | 0-4 | -0.000363 | 0.000273 | 0.1837 | 26412.3 | 0.1836 | 26412.3 | 0.0  |
|            | 0-5 | -0.000261 | 0.000282 | 0.3553 | 26406.4 | 0.3552 | 26406.4 | 0.0  |
| Kitakyushu | 0   | 0.000067  | 0.000327 | 0.8387 | 22370.9 | 0.8397 | 22370.9 | 0.0  |
|            | 1   | 0.000474  | 0.000310 | 0.1264 | 22362.6 | 0.0278 | 22356.0 | -6.6 |
|            | 2   | 0.000500  | 0.000291 | 0.0857 | 22354.1 | 0.1741 | 22353.8 | -0.4 |

|         |     |           |          |        |         |        |         |      |
|---------|-----|-----------|----------|--------|---------|--------|---------|------|
|         | 3   | 0.001051  | 0.000290 | 0.0003 | 22334.0 | 0.0003 | 22334.0 | 0.0  |
|         | 4   | 0.000486  | 0.000291 | 0.0945 | 22339.0 | 0.0946 | 22339.0 | 0.0  |
|         | 5   | 0.000403  | 0.000291 | 0.1669 | 22334.6 | 0.1690 | 22334.6 | 0.0  |
|         | 0-1 | 0.000399  | 0.000374 | 0.2859 | 22363.8 | 0.1017 | 22359.8 | -4.0 |
|         | 0-2 | 0.000616  | 0.000392 | 0.1161 | 22354.5 | 0.0762 | 22351.9 | -2.6 |
|         | 0-3 | 0.001008  | 0.000405 | 0.0128 | 22341.0 | 0.0210 | 22339.5 | -1.5 |
|         | 0-4 | 0.001062  | 0.000418 | 0.0111 | 22335.2 | 0.0113 | 22335.2 | 0.0  |
|         | 0-5 | 0.001083  | 0.000429 | 0.0117 | 22329.9 | 0.0117 | 22329.9 | 0.0  |
| Fukuoka | 0   | -0.000140 | 0.000354 | 0.6929 | 21993.0 | 0.6940 | 21993.0 | 0.0  |
|         | 1   | -0.000465 | 0.000340 | 0.1712 | 21985.1 | 0.1720 | 21985.1 | 0.0  |
|         | 2   | -0.000031 | 0.000318 | 0.9212 | 21981.8 | 0.9220 | 21981.8 | 0.0  |
|         | 3   | -0.000120 | 0.000316 | 0.7046 | 21976.1 | 0.7060 | 21976.1 | 0.0  |
|         | 4   | -0.000053 | 0.000316 | 0.8671 | 21969.8 | 0.6460 | 21968.9 | -0.9 |
|         | 5   | -0.000485 | 0.000317 | 0.1262 | 21961.6 | 0.1260 | 21961.6 | 0.0  |
|         | 0-1 | -0.000405 | 0.000397 | 0.3080 | 21985.9 | 0.0306 | 21977.1 | -8.9 |
|         | 0-2 | -0.000316 | 0.000415 | 0.4466 | 21981.1 | 0.2460 | 21978.6 | -2.5 |
|         | 0-3 | -0.000310 | 0.000427 | 0.4676 | 21975.7 | 0.4010 | 21974.8 | -0.8 |
|         | 0-4 | -0.000280 | 0.000439 | 0.5238 | 21969.3 | 0.5240 | 21969.3 | 0.0  |
|         | 0-5 | -0.000404 | 0.000449 | 0.3686 | 21963.2 | 0.3690 | 21963.2 | 0.0  |

---

$\Delta AIC = AIC$  of Spline Model –  $AIC$  of Linear Model

Table S2. Associations between daily mean O3(lag0-1) and daily number of mortality adjusting for different temperature lags in 13 Japanese and Korean cities from 2000 to 2009

| City    | Temp. Lag | Linear Model |          |        |         | Spline Model |         | $\Delta$ AIC |
|---------|-----------|--------------|----------|--------|---------|--------------|---------|--------------|
|         |           | Beta         | SE       | P      | AIC     | P            | AIC     |              |
| Seoul   | 0         | -0.00003     | 0.000230 | 0.8945 | 27968.5 | 0.0000       | 27920.0 | -48.5        |
|         | 0-1       | 0.00007      | 0.000231 | 0.7749 | 27943.6 | 0.0001       | 27925.0 | -18.6        |
|         | 0-3       | 0.00017      | 0.000229 | 0.4686 | 27880.5 | 0.0001       | 27862.7 | -17.8        |
|         | 0-7       | 0.00023      | 0.000224 | 0.3124 | 27776.0 | 0.0009       | 27763.8 | -12.2        |
|         | 0-14      | 0.00015      | 0.000223 | 0.5072 | 27691.2 | 0.0034       | 27681.1 | -10.1        |
|         | 0-28      | 0.00011      | 0.000222 | 0.6263 | 27625.6 | 0.0193       | 27618.7 | -6.9         |
| Incheon | 0         | -0.00088     | 0.000388 | 0.1356 | 22737.8 | 0.1799       | 22737.1 | -0.7         |
|         | 0-1       | -0.00057     | 0.000388 | 0.1434 | 22729.4 | 0.2129       | 22728.9 | -0.6         |
|         | 0-3       | -0.00057     | 0.000390 | 0.1421 | 22705.6 | 0.3080       | 22705.3 | -0.2         |
|         | 0-7       | -0.00063     | 0.000393 | 0.1108 | 22679.0 | 0.1798       | 22678.9 | 0.0          |
|         | 0-14      | -0.00059     | 0.000395 | 0.1371 | 22634.6 | 0.1917       | 22637.2 | 2.6          |
|         | 0-28      | -0.00058     | 0.000393 | 0.1380 | 22561.2 | 0.1381       | 22561.2 | 0.0          |
| Daejon  | 0         | -0.00024     | 0.000542 | 0.6620 | 20056.7 | 0.6633       | 20056.7 | 0.0          |
|         | 0-1       | -0.00019     | 0.000547 | 0.7220 | 20054.2 | 0.7223       | 20054.2 | 0.0          |
|         | 0-3       | -0.00019     | 0.000548 | 0.7326 | 20044.7 | 0.7329       | 20044.7 | 0.0          |
|         | 0-7       | -0.00027     | 0.000546 | 0.6257 | 20017.2 | 0.6258       | 20017.2 | 0.0          |
|         | 0-14      | -0.00037     | 0.000553 | 0.4991 | 19976.2 | 0.5000       | 19976.2 | 0.0          |
|         | 0-28      | -0.00046     | 0.000544 | 0.4006 | 19893.0 | 0.4012       | 19893.0 | 0.0          |



|         |      |         |          |        |         |        |         |       |
|---------|------|---------|----------|--------|---------|--------|---------|-------|
| Daegu   | 0    | 0.00063 | 0.000384 | 0.1019 | 22898.4 | 0.0426 | 22894.1 | -4.3  |
|         | 0-1  | 0.00073 | 0.000385 | 0.0570 | 22879.5 | 0.0316 | 22875.5 | -4.0  |
|         | 0-3  | 0.00059 | 0.000384 | 0.1269 | 22855.4 | 0.0948 | 22852.9 | -2.5  |
|         | 0-7  | 0.00047 | 0.000385 | 0.2177 | 22818.2 | 0.3336 | 22817.7 | -0.5  |
|         | 0-14 | 0.00041 | 0.000383 | 0.2866 | 22771.5 | 0.5396 | 22771.4 | -0.1  |
|         | 0-28 | 0.00036 | 0.000384 | 0.3493 | 22697.5 | 0.3390 | 22697.2 | -0.3  |
| Gwangju | 0    | 0.00103 | 0.000570 | 0.0698 | 20247.6 | 0.0698 | 20247.6 | 0.0   |
|         | 0-1  | 0.00106 | 0.000571 | 0.0629 | 20243.6 | 0.0630 | 20243.6 | 0.0   |
|         | 0-3  | 0.00093 | 0.000567 | 0.1018 | 20233.2 | 0.1019 | 20233.2 | 0.0   |
|         | 0-7  | 0.00080 | 0.000540 | 0.1373 | 20197.1 | 0.1443 | 20197.1 | 0.0   |
|         | 0-14 | 0.00083 | 0.000538 | 0.1226 | 20140.5 | 0.1487 | 20140.3 | -0.3  |
|         | 0-28 | 0.00075 | 0.000535 | 0.1629 | 20058.5 | 0.2593 | 20057.9 | -0.7  |
| Busan   | 0    | 0.00091 | 0.000310 | 0.0035 | 24783.3 | 0.0000 | 24760.5 | -22.8 |
|         | 0-1  | 0.00096 | 0.000312 | 0.0021 | 24770.4 | 0.0000 | 24747.9 | -22.5 |
|         | 0-3  | 0.00096 | 0.000312 | 0.0020 | 24730.6 | 0.0000 | 24711.9 | -18.7 |
|         | 0-7  | 0.00104 | 0.000307 | 0.0007 | 24670.2 | 0.0000 | 24655.7 | -14.4 |
|         | 0-14 | 0.00106 | 0.000300 | 0.0004 | 24608.9 | 0.0000 | 24596.8 | -12.1 |
|         | 0-28 | 0.00125 | 0.000294 | 0.0000 | 24497.0 | 0.0000 | 24490.2 | -6.9  |
| Ulsan   | 0    | 0.00092 | 0.000659 | 0.1626 | 18692.2 | 0.1627 | 18692.2 | 0.0   |
|         | 0-1  | 0.00097 | 0.000659 | 0.1400 | 18690.9 | 0.1400 | 18690.9 | 0.0   |
|         | 0-3  | 0.00081 | 0.000692 | 0.2439 | 18675.7 | 0.2440 | 18675.7 | 0.0   |
|         | 0-7  | 0.00100 | 0.000651 | 0.1252 | 18646.1 | 0.1254 | 18646.1 | 0.0   |

|         |      |          |          |        |         |        |         |       |
|---------|------|----------|----------|--------|---------|--------|---------|-------|
|         | 0-14 | 0.00083  | 0.000672 | 0.2159 | 18603.6 | 0.2161 | 18603.6 | 0.0   |
|         | 0-28 | 0.00071  | 0.000666 | 0.2830 | 18526.6 | 0.2832 | 18526.6 | 0.0   |
| Sapporo | 0    | 0.00085  | 0.000387 | 0.0277 | 23342.2 | 0.0479 | 23341.2 | -1.0  |
|         | 0-1  | 0.00082  | 0.000389 | 0.0362 | 23330.1 | 0.0675 | 23329.4 | -0.7  |
|         | 0-3  | 0.00064  | 0.000400 | 0.1094 | 23297.8 | 0.2218 | 23297.3 | -0.4  |
|         | 0-7  | 0.00039  | 0.000382 | 0.3130 | 23250.4 | 0.5204 | 23250.2 | -0.1  |
|         | 0-14 | 0.00015  | 0.000381 | 0.7025 | 23149.6 | 0.7026 | 23149.6 | 0.0   |
|         | 0-28 | -0.00001 | 0.000397 | 0.9784 | 22955.4 | 0.9853 | 22955.4 | 0.0   |
| Tokyo   | 0    | -0.00013 | 0.000160 | 0.4112 | 30555.9 | 0.0000 | 30530.0 | -25.8 |
|         | 0-1  | 0.00004  | 0.000159 | 0.7796 | 30402.0 | 0.0003 | 30382.3 | -19.7 |
|         | 0-3  | 0.00011  | 0.000160 | 0.4912 | 30169.1 | 0.0002 | 30149.0 | -20.2 |
|         | 0-7  | -0.00010 | 0.000162 | 0.5353 | 30022.7 | 0.0002 | 30001.8 | -21.0 |
|         | 0-14 | -0.00035 | 0.000163 | 0.0294 | 30065.1 | 0.0000 | 30043.7 | -21.4 |
|         | 0-28 | -0.00081 | 0.000161 | 0.0000 | 30096.6 | 0.0000 | 30058.9 | -37.7 |
| Nagoya  | 0    | 0.00018  | 0.000352 | 0.6140 | 24744.9 | 0.0558 | 24738.2 | -6.7  |
|         | 0-1  | 0.00025  | 0.000350 | 0.4779 | 24687.4 | 0.0949 | 24682.7 | -4.7  |
|         | 0-3  | 0.00023  | 0.000351 | 0.5126 | 24586.2 | 0.2168 | 24583.5 | -2.7  |
|         | 0-7  | 0.00007  | 0.000354 | 0.8385 | 24491.0 | 0.4395 | 24489.9 | -1.2  |
|         | 0-14 | -0.00005 | 0.000359 | 0.8813 | 24399.9 | 0.4006 | 24398.3 | -1.6  |
|         | 0-28 | -0.00021 | 0.000362 | 0.5528 | 24231.5 | 0.3362 | 24229.1 | -2.4  |
| Osaka   | 0    | -0.00070 | 0.000272 | 0.0103 | 26459.5 | 0.0165 | 26457.6 | -1.9  |

|            |      |          |          |        |         |         |         |       |
|------------|------|----------|----------|--------|---------|---------|---------|-------|
|            | 0-1  | -0.00053 | 0.000272 | 0.0494 | 26374.7 | 0.0564  | 26374.5 | -0.2  |
|            | 0-3  | -0.00033 | 0.000271 | 0.2287 | 26234.8 | 0.2287  | 26234.8 | 0.0   |
|            | 0-7  | -0.00026 | 0.000271 | 0.3468 | 26094.7 | 0.3469  | 26094.7 | 0.0   |
|            | 0-14 | -0.00039 | 0.000271 | 0.1497 | 25910.0 | 0.1497  | 25910.0 | 0.0   |
|            | 0-28 | -0.00072 | 0.000270 | 0.0080 | 25562.0 | 0.0080  | 25562.0 | 0.0   |
| Kitakyushu | 0    | 0.00057  | 0.000414 | 0.1686 | 22369.5 | 0.1060  | 22365.5 | -4.0  |
|            | 0-1  | 0.00080  | 0.000417 | 0.0538 | 22324.0 | 0.1219  | 22322.7 | -1.3  |
|            | 0-3  | 0.00071  | 0.000413 | 0.0850 | 22245.2 | 0.0892  | 22245.2 | 0.0   |
|            | 0-7  | 0.00055  | 0.000409 | 0.1745 | 22195.4 | 0.1749  | 22195.4 | 0.0   |
|            | 0-14 | 0.00036  | 0.000405 | 0.3785 | 22151.9 | 0.3786  | 22151.9 | 0.0   |
|            | 0-28 | 0.00005  | 0.000395 | 0.8939 | 22073.6 | 0.8938  | 22073.6 | 0.0   |
| Fukuoka    | 0    | -0.00017 | 0.000445 | 0.7108 | 21991.2 | 0.02583 | 21981.3 | -10.0 |
|            | 0-1  | -0.00017 | 0.000443 | 0.7088 | 21978.8 | 0.04120 | 21970.2 | -8.6  |
|            | 0-3  | -0.00033 | 0.000435 | 0.4435 | 21947.7 | 0.04373 | 21939.6 | -8.1  |
|            | 0-7  | -0.00046 | 0.000421 | 0.2727 | 21909.2 | 0.03635 | 21901.1 | -8.0  |
|            | 0-14 | -0.00076 | 0.000411 | 0.0657 | 21869.1 | 0.01677 | 21861.6 | -7.5  |
|            | 0-28 | -0.00112 | 0.000398 | 0.0050 | 21802.0 | 0.00281 | 21794.0 | -8.0  |

---

$\Delta AIC = AIC$  of Spline Model –  $AIC$  of Linear Model

Table S3. Associations between daily mean O<sub>3</sub> (lag<sub>0-1</sub>, ppb) and daily number of deaths from cardiovascular and respiratory diseases in 13 Japanese and Korean cities from 2000 to 2009

| Cause of Death | City       | Linear Model |          |         |         | Spline Model |         | ΔAIC  |
|----------------|------------|--------------|----------|---------|---------|--------------|---------|-------|
|                |            | Beta         | SE       | P       | AIC     | P            | AIC     |       |
| Cardiovascular | Seoul      | -0.000827    | 0.000442 | 0.0615  | 22283.9 | <0.0001      | 22251.9 | -32.0 |
|                | Incheon    | -0.000689    | 0.000717 | 0.3364  | 17617.3 | 0.3370       | 17617.3 | 0.0   |
|                | Daejon     | -0.002485    | 0.001068 | 0.0200  | 14740.7 | 0.0201       | 14740.7 | 0.0   |
|                | Daegu      | 0.000545     | 0.000756 | 0.4710  | 17433.8 | 0.4790       | 17433.8 | 0.0   |
|                | Gwangju    | 0.000778     | 0.001214 | 0.5210  | 14339.4 | 0.2940       | 14336.7 | -2.6  |
|                | Busan      | -0.000448    | 0.000549 | 0.4142  | 19901.6 | 0.4830       | 19900.9 | -0.7  |
|                | Ulsan      | 0.002903     | 0.001295 | 0.0250  | 13334.3 | 0.0794       | 13333.5 | -0.8  |
|                | Sapporo    | -0.000006    | 0.000606 | 0.9921  | 18849.8 | 0.6230       | 18849.1 | -0.6  |
|                | Tokyo      | -0.001169    | 0.000253 | <0.0001 | 25415.2 | <0.0001      | 25387.6 | -27.6 |
|                | Nagoya     | -0.001024    | 0.000567 | 0.0706  | 20165.7 | 0.0093       | 20158.3 | -7.4  |
|                | Osaka      | -0.000131    | 0.000473 | 0.7819  | 21365.6 | 0.7820       | 21365.6 | 0.0   |
|                | Kitakyushu | 0.001255     | 0.000698 | 0.0721  | 17405.9 | 0.1302       | 17405.9 | 0.0   |
|                | Fukuoka    | -0.000896    | 0.000790 | 0.2568  | 16746.2 | 0.0549       | 16740.8 | -5.4  |
| Respiratory    | Seoul      | 0.002757     | 0.000943 | 0.0035  | 16538.4 | 0.0035       | 16538.4 | 0.0   |
|                | Incheon    | 0.001919     | 0.001496 | 0.1994  | 11719.3 | 0.2000       | 11719.3 | 0.0   |
|                | Daejon     | 0.001526     | 0.001962 | 0.4367  | 9510.0  | 0.1153       | 9505.9  | -4.1  |
|                | Daegu      | 0.005671     | 0.001515 | 0.0002  | 11972.3 | 0.0007       | 11970.5 | -1.8  |
|                | Gwangju    | -0.000025    | 0.002143 | 0.9910  | 9082.5  | 0.1870       | 9079.0  | -3.5  |
|                | Busan      | 0.002247     | 0.001202 | 0.0616  | 13754.4 | 0.0201       | 13747.4 | -7.0  |
|                | Ulsan      | 0.003623     | 0.002554 | 0.1560  | 7918.7  | 0.1561       | 7918.7  | 0.0   |
|                | Sapporo    | 0.001289     | 0.000922 | 0.1620  | 15627.1 | 0.2910       | 15627.1 | -0.1  |

|            |           |          |        |         |        |         |      |
|------------|-----------|----------|--------|---------|--------|---------|------|
| Tokyo      | -0.000448 | 0.000368 | 0.2230 | 22550.3 | 0.3696 | 22550.2 | 0.0  |
| Nagoya     | 0.001085  | 0.000819 | 0.1852 | 17096.1 | 0.1860 | 17096.1 | 0.0  |
| Osaka      | 0.000614  | 0.000629 | 0.3290 | 18966.4 | 0.3290 | 18966.4 | 0.0  |
| Kitakyushu | 0.001909  | 0.000960 | 0.0468 | 14993.1 | 0.0533 | 14989.7 | -3.4 |
| Fukuoka    | -0.000357 | 0.000921 | 0.6984 | 14770.5 | 0.8520 | 14771.4 | 0.9  |

---

$\Delta AIC = AIC$  of Spline Model – AIC of Linear Model

Table S4. Associations between daily maximum 1-hour O<sub>3</sub> (ppb) and daily mortality in Korean cities from 2000 to 2009

| City    | Linear Model |          |        |         | Spline Model |         | ΔAIC  |
|---------|--------------|----------|--------|---------|--------------|---------|-------|
|         | Beta         | SE       | P      | AIC     | P            | AIC     |       |
| Seoul   | 0.000011     | 0.000127 | 0.9297 | 28035.0 | 0.0072       | 28025.6 | -9.4  |
| Incheon | -0.000505    | 0.000225 | 0.0246 | 22754.4 | 0.0248       | 22754.4 | 0.0   |
| Daejon  | 0.000191     | 0.000355 | 0.5900 | 20119.4 | 0.2321       | 20115.7 | -3.7  |
| Daegu   | 0.000454     | 0.000243 | 0.0618 | 22921.8 | 0.0875       | 22918.4 | -3.4  |
| Gwangju | 0.000641     | 0.000360 | 0.0754 | 20287.2 | 0.0980       | 20287.0 | -0.2  |
| Busan   | 0.000464     | 0.000200 | 0.0204 | 24845.3 | 0.0016       | 24833.8 | -11.4 |
| Ulsan   | 0.000223     | 0.000447 | 0.6180 | 18744.5 | 0.3540       | 18742.6 | -1.9  |

ΔAIC=AIC of Spline Model – AIC of Linear Model

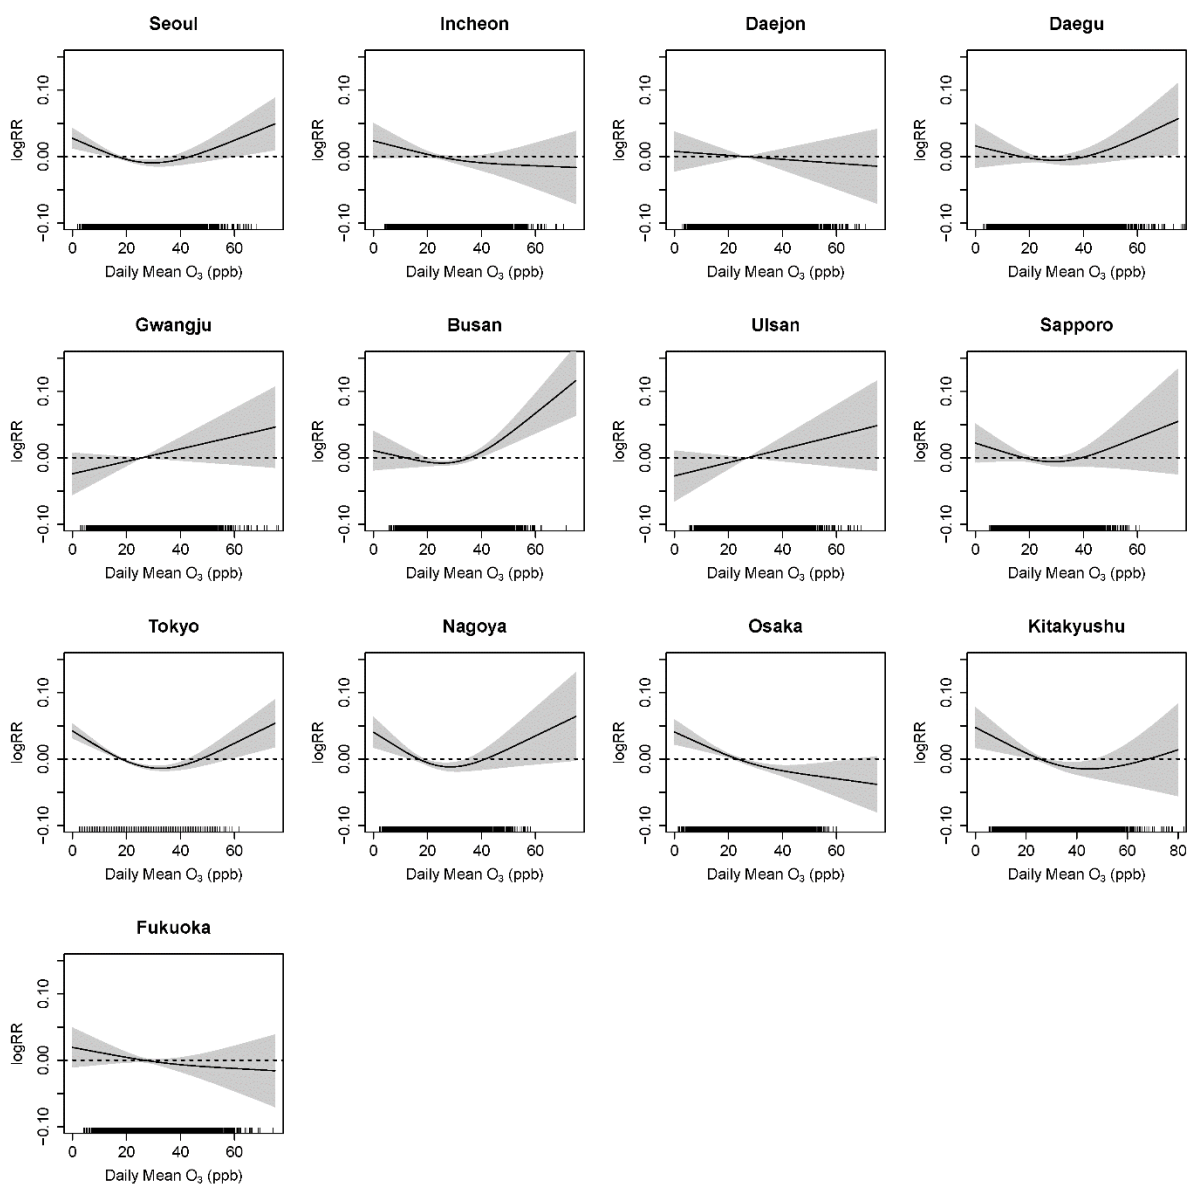

Figure S1. Associations between daily mean O<sub>3</sub> (lag0-1, ppb) and daily mortality adjusting for PM<sub>10</sub> in 13 Japanese and Korean cities from 2000 to 2009

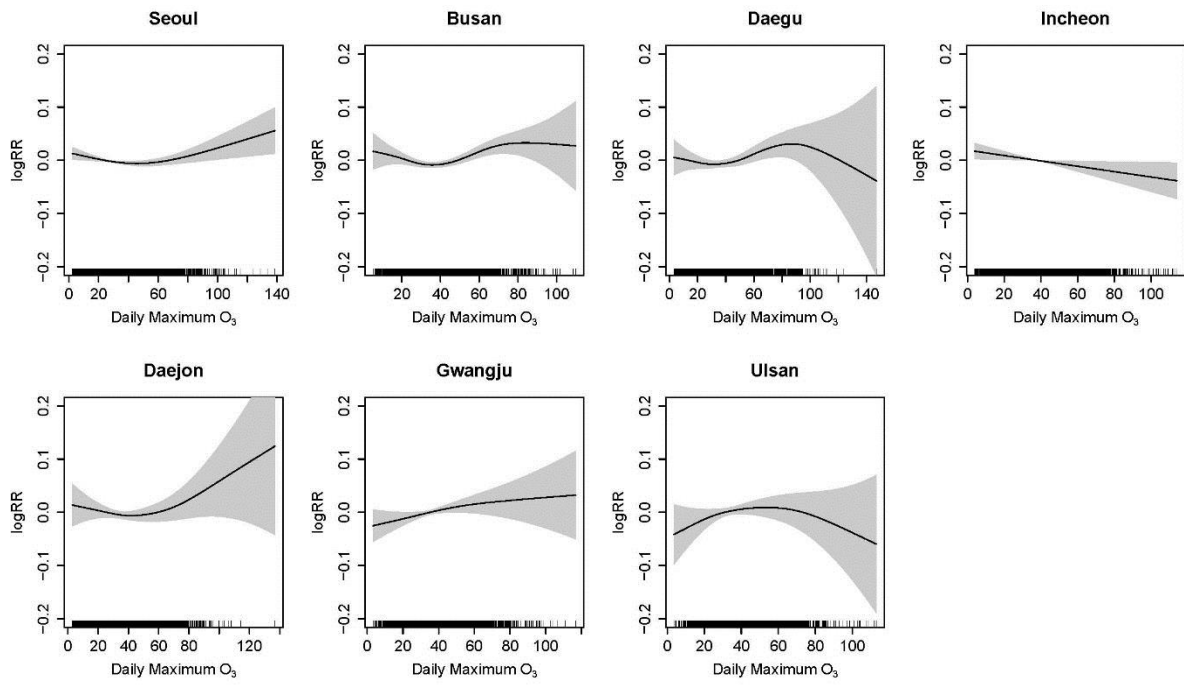

Figure S2. Associations between daily maximum 1-hour O<sub>3</sub> (ppb) concentration and daily mortality in 7 Korean cities from 2000 to 2009



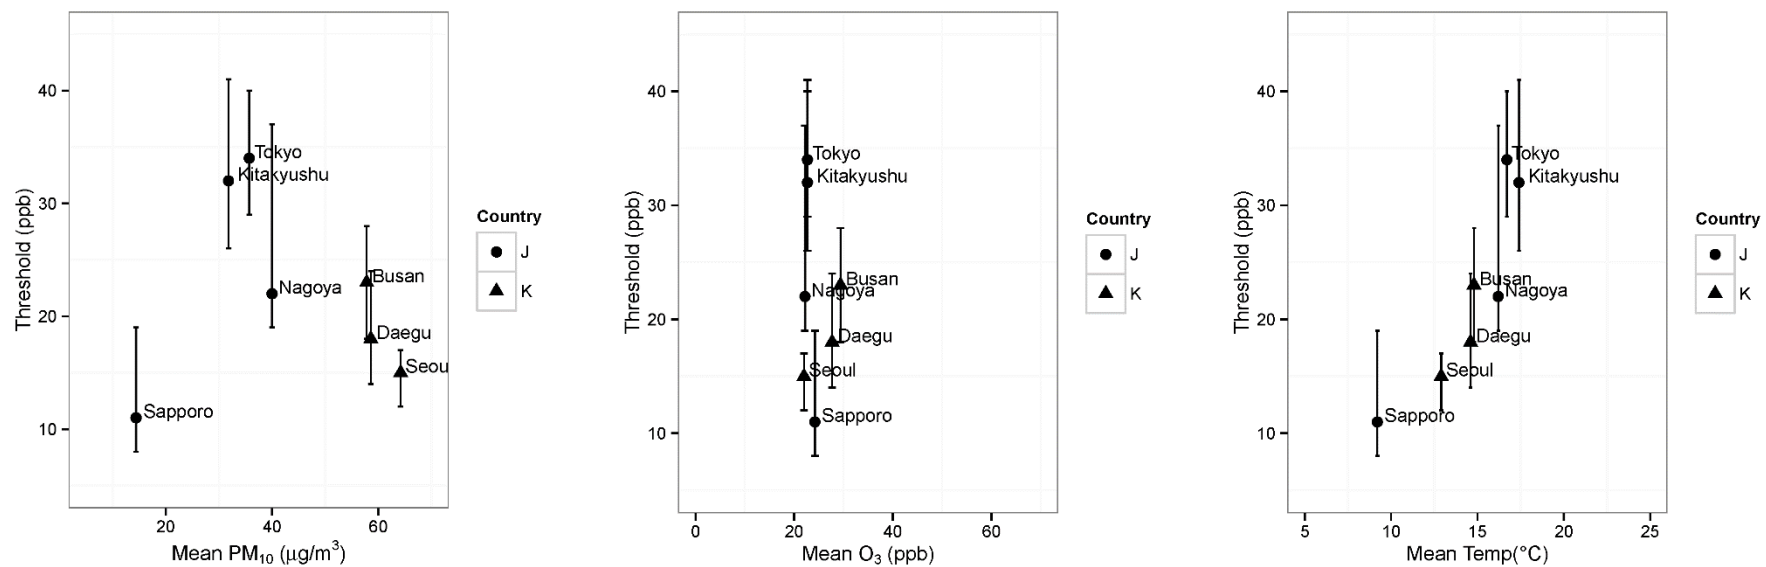

Fig. S3. Selected city-specific factors and the thresholds of concentration-response relationship between O<sub>3</sub> concentration and daily mortality in the 7 cities with non-linear association

J: Japan, K: Korea
